# Supplementary material
Source: Elsevier journal article supplement (https://www.sciencedirect.com/science/article/pii/S0300289622005105)
Supplement: mmc1 [file S0300289622005105:mmc1.pdf]

**Supplementary Table:** Supplement table with Adjusted Outcomes and sensitivity analysis

|                                                          | Unadjusted             |                  | Adjusted              |                 | Sens Analysis 1     |                  |
|----------------------------------------------------------|------------------------|------------------|-----------------------|-----------------|---------------------|------------------|
| Outcome Variables                                        | HR (95% CI)            | P                | HR (95% CI)           | P               | OR (95% CI)         | P                |
| <b>DISEASE SEVERITY PROGRESSION</b>                      |                        |                  |                       |                 |                     |                  |
| <b>Severe Disease (IMV) or death*</b>                    | 1.28 (1.20 to 1.37)    | <b>&lt;0.01</b>  | 0.91 (0.84 to 0.99)   | <b>0.02</b>     | 0.92 (0.85 to 0.99) | <b>0.035</b>     |
| <b>OUTCOME</b>                                           |                        |                  |                       |                 |                     |                  |
| <b>ICU admission</b>                                     | 0.85 (0.80 to 0.91)    | <b>&lt;0.01</b>  | 0.78 (0.73 to 0.84)   | <b>&lt;0.01</b> | 0.76 (0.71 to 0.82) | <b>&lt;0.01</b>  |
| <b>Hospital mortality</b>                                | 1.48 (1.37 to 1.60)    | <b>&lt;0.01</b>  | 0.89 (0.82 to 0.97)   | <b>0.01</b>     | 0.89 (0.81 to 0.97) | <b>0.01</b>      |
| <b>COMPLICATIONS</b>                                     |                        |                  |                       |                 |                     |                  |
| <b>CVA</b>                                               | 1.40 (1.06 to 1.86)    | <b>0.02</b>      | 1.07 (0.79 to 1.47)   | 0.65            | 1.07 (0.78 to 1.47) | 0.66             |
| <b>GI hemorrhage</b>                                     | 1.65 (1.25 to 2.18)    | <b>&lt;0.01</b>  | 1.14 (0.84 to 1.55)   | 0.40            | 1.16 (0.85 to 1.57) | 0.34             |
| <b>Myocardial Infarction**</b>                           | 1.95 (1.70 to 2.25)    | <b>&lt;0.01</b>  | 1.21 (1.04 to 1.42)   | <b>0.02</b>     | 1.23 (1.05 to 1.44) | <b>0.01</b>      |
| <b>Elevation in Troponin</b>                             | 1.93 (1.67 to 2.24)    | <b>&lt;0.01</b>  | 1.27 (1.09 to 1.50)   | <b>0.03</b>     | 1.29 (1.11 to 1.52) | <b>&lt;0.01</b>  |
| <b>ST elevation in EKG</b>                               | 2.56 (1.59 to 4.12)    | <b>&lt;0.001</b> | 2.03 (1.18 to 3.47)   | <b>&lt;0.01</b> | 2.09 (1.22 to 3.59) | <b>&lt;0.01</b>  |
| <b>NEED FOR TRANSFUSION<sup>¥</sup></b>                  |                        |                  |                       |                 |                     |                  |
| <b>Any blood product transfusion (first 24 hr)</b>       | 1.21 (0.98 to 1.51)    | 0.075            | 1.03 (0.82 to 1.30)   | 0.79            | 1.05 (0.83 to 1.33) | 0.68             |
| <b>pRBC transfusion</b>                                  | 1.29 (1.03 to 1.61)    | <b>0.028</b>     | 1.07 (0.84 to 1.36)   | 0.59            | 1.09 (0.85 to 1.39) | 0.50             |
| <b>LENGTH OF STAY MEASURES (Not HR but Days[95% CI])</b> |                        |                  |                       |                 |                     |                  |
| <b>Hospital-free days</b>                                | -1.14 (-1.46 to -0.81) | <b>&lt;0.01</b>  | 1.00 (0.66 to 1.35)   | <b>&lt;0.01</b> | 0.90                | <b>&lt;0.001</b> |
| <b>ICU-free days</b>                                     | -2.19 (-2.76 to -1.63) | <b>&lt;0.01</b>  | 0.33 (-0.27 to 0.93)  | 0.29            | 0.06                | 0.85             |
| <b>IMV-free days</b>                                     | 0.50 (-0.13 to 1.13)   | 0.12             | -0.27 (-0.96 to 0.40) | 0.42            | 0.18                | 0.65             |

Adjusted models were adjusted for age, sex, ethnicity, race, and comorbidities of CAD, HTN, CHF, Stroke, chronic pulmonary diseases (COPD, asthma, pulmonary circulatory diseases), history of VTE, diabetes mellitus, chronic kidney disease and Obesity.

**\*WHO 6 or above, \*\* ST elevation in EKG or elevation in Troponin, ¥ (N = 11,654)**

Sensitivity Analysis: Sensitivity Analysis: The model was the same as the original model PLUS additional adjustment for the time since the pandemic was divided into quarters (4 quarters in 2020 and 3 in 2021 for the data in this manuscript).
